# Supplementary material
Source: PubMed Central journal article supplement (PMC7501232)
Supplement: NIHMS1607851-supplement-1.pdf [file NIHMS1607851-supplement-1.pdf]

## SUPPLEMENTAL INFORMATION ONLINE-ONLY CONTENT

### **Effects of white matter hyperintensities on 90-day functional outcome after large vessel and non-large vessel stroke**

Christoph J. Griessenauer<sup>1,2</sup>, David McPherson<sup>3</sup>, Andrea Berger<sup>4</sup>, Ping Cuiper<sup>4</sup>, Nelson Sofoluke<sup>1</sup>, Matthew D. Adams<sup>3</sup>, Saran Kunaprayoon<sup>3</sup>, Ramin Zand<sup>5</sup>, Jiang Li<sup>6</sup>, Vida Abedi<sup>6,7</sup>, Oded Goren<sup>1</sup>, Clemens M. Schirmer<sup>1</sup>, Kathleen Donahue<sup>8</sup>, Marco Nardin<sup>8</sup>, Anne-Karin Giese<sup>8</sup>, Markus D. Schirmer<sup>8</sup>, Natalia S. Rost<sup>8</sup>, Philipp Hendrix<sup>1,9</sup>

<sup>1</sup>Department of Neurosurgery, Geisinger, Danville, PA

<sup>2</sup>Research Institute of Neurointervention, Paracelsus Medical University, Salzburg, Austria

<sup>3</sup>Geisinger Commonwealth School of Medicine, Scranton, PA

<sup>4</sup>Biostatistics Core, Geisinger, Danville, PA

<sup>5</sup>Department of Neurology, Geisinger, Danville, PA

<sup>6</sup>Department of Molecular and Functional Genomics, Geisinger, Danville, PA

<sup>7</sup>Biocomplexity Institute, Virginia Tech, Blacksburg, VA, USA.

<sup>8</sup>Department of Neurology, Massachusetts General Hospital, Harvard Medical School, Boston, MA

<sup>9</sup>Department of Neurosurgery, Saarland University Medical Center and Saarland University Faculty of Medicine, Homburg/Saar, Germany

## Supplemental Tables

Table 1. Variables used in Multiple Imputation Process

| Variable Name                      | Missing %<br>(Out of n = 1601) |
|------------------------------------|--------------------------------|
| ReStroked_within_1year             | 0.0%                           |
| TOAST_Stroke_Subtype               | 0.0%                           |
| Year_admitted(year)                | 0.0%                           |
| Age                                | 0.0%                           |
| Female                             | 0.0%                           |
| BMI_30above                        | 0.0%                           |
| Intracranial_Arterio               | 0.0%                           |
| MoyaMoya                           | 0.0%                           |
| Dementia                           | 0.0%                           |
| Parkinsons                         | 0.0%                           |
| Peripheral_Vasc_Disease            | 0.0%                           |
| Anema                              | 0.0%                           |
| Procoagulant                       | 0.0%                           |
| COPD                               | 0.0%                           |
| Sleep_Apnea                        | 0.0%                           |
| Hypertension                       | 0.0%                           |
| Diabetes_mellitus2                 | 0.0%                           |
| Carotid_Stenosis                   | 0.0%                           |
| Dyslipidemia                       | 0.0%                           |
| Coronary_artery_disease            | 0.0%                           |
| Atrial_Fib                         | 0.0%                           |
| prior_TIA                          | 0.0%                           |
| prior_IS_HS_CVA                    | 0.0%                           |
| Family_History                     | 0.0%                           |
| Smoking_Status                     | 1.8%                           |
| Drinking                           | 5.6%                           |
| NIHS_Admission(nihss_at_admission) | 4.6%                           |
| LVO                                | 0.0%                           |
| LVO_prox_Circ_IM1M2(anterior_lvo)  | 0.0%                           |
| Stroke_Therapy_ivTPA_Embolectomy   | 0.0%                           |
| secondary_ICH                      | 0.0%                           |
| discharge_ASPIRIN                  | 0.0%                           |
| discharge_CLOPIDOGREL              | 0.0%                           |
| discharge_Anticoagulation          | 0.0%                           |
| discharge_Brillinta                | 0.0%                           |
| discharge_Prasugrel                | 0.0%                           |
| Outcome_90d_mRS02                  | 0.0%                           |
| Outcome_90d_mRS6                   | 0.0%                           |
| HOME_Platelets_None_Mono_Duo       | 0.0%                           |
| HOME_Anticoag                      | 0.0%                           |
| HOME_Statins                       | 0.0%                           |
| HOME_AT1_ACEinhib                  | 0.0%                           |
| HOME_Beta_Blocker                  | 0.0%                           |

|                         |       |
|-------------------------|-------|
| HOMe_Metformin          | 0.0%  |
| Home_Oral_Antidiabetics | 0.0%  |
| WMH_volume              | 19.7% |
| Stroke_sequence         | 0.0%  |

Table 2: Comparison of the characteristics of strokes with and without WMH volumes

|                                               | <b>WMH Volume<br/>Missing<br/>(n = 316)</b> | <b>WMH Volume<br/>Present<br/>(n = 1285)</b> | <b>P-value*</b> |
|-----------------------------------------------|---------------------------------------------|----------------------------------------------|-----------------|
| Age, Mean (SD)/Median (IQR)                   | 70.1 (14.0)/ 72 (60, 81)                    | 67.1 (13.2)/ 68 (58, 77)                     | 0.0003          |
| Male, n (%)                                   | 169 (53.5)                                  | 644 (50.1)                                   | 0.2865          |
| History of Hypertension, n (%)                | 254 (80.4)                                  | 1010 (78.6)                                  | 0.5379          |
| History of Type II Diabetes, n (%)            | 129 (40.8)                                  | 492 (38.3)                                   | 0.4394          |
| Dyslipidemia, n (%)                           | 221 (69.9)                                  | 927 (72.1)                                   | 0.4437          |
| Current or Former Smoker, n (%)               | 202 (66.2)                                  | 752 (59.4)                                   | 0.0311          |
| <i>Missing, n</i>                             | <i>11</i>                                   | <i>18</i>                                    |                 |
| Alcohol Consumption, n (%)                    | 103 (35.0)                                  | 449 (36.9)                                   | 0.5895          |
| <i>Missing, n</i>                             | <i>22</i>                                   | <i>67</i>                                    |                 |
| BMI $\geq$ 30, n (%)                          | 163 (51.6)                                  | 592 (46.1)                                   | 0.0894          |
| Peripheral Vascular Disease, n (%)            | 34 (10.8)                                   | 127 (9.9)                                    | 0.6762          |
| Coronary Artery Disease, n (%)                | 125 (39.6)                                  | 352 (27.4)                                   | < 0.0001        |
| Atrial Fibrillation, n (%)                    | 113 (35.8)                                  | 242 (18.8)                                   | < 0.0001        |
| Carotid Stenosis, n (%)                       | 121 (38.3)                                  | 486 (37.8)                                   | 0.8971          |
| Intracranial Atherosclerotic Stenosis, n (%)  | 89 (28.2)                                   | 394 (30.7)                                   | 0.4120          |
| Anemia, n (%)                                 | 55 (17.4)                                   | 188 (14.6)                                   | 0.2211          |
| Pro-Coagulant Coagulation Disorder, n (%)     | 15 (4.7)                                    | 56 (4.4)                                     | 0.7607          |
| COPD, n (%)                                   | 53 (16.8)                                   | 135 (10.5)                                   | 0.0033          |
| Sleep Apnea, n (%)                            | 38 (12.0)                                   | 132 (10.3)                                   | 0.3601          |
| Family History of Stroke, n (%)               | 68 (21.5)                                   | 290 (22.6)                                   | 0.7072          |
| Prior TIA, n (%)                              | 47 (14.9)                                   | 144 (11.2)                                   | 0.0809          |
| Prior Stroke (hemorrhagic or ischemic), n (%) | 75 (23.7)                                   | 267 (20.8)                                   | 0.2513          |
| mRS 0-2 (Favorable)                           | 167 (52.8)                                  | 907 (70.6)                                   | < 0.0001        |

\*P-value: Continuous variables were compared using Wilcoxon rank-sum tests and categorical variables were compared using Fisher's exact tests.

Table 3. Baseline demographic and stroke risk factor characteristics among encounters with values of WMH (n=1,285)

|                                               | <b>Entire Cohort<br/>(n = 1285)</b> | <b>mRS 0-2<br/>Favorable<br/>(n = 907)</b> | <b>mRS 3-6<br/>Unfavorable<br/>(n = 378)</b> | <b>P-value*</b> |
|-----------------------------------------------|-------------------------------------|--------------------------------------------|----------------------------------------------|-----------------|
| Age (years) (median [IQR], mean $\pm$ SD)     | 68 [58 – 77],<br>67.1 $\pm$ 13.2    | 66 [57 – 75],<br>65.4 $\pm$ 13.2           | 73 [63 – 81],<br>71.4 $\pm$ 12.4             | < 0.0001        |
| Females, n (%)                                | 641 (49.9%)                         | 430 (47.4%)                                | 211 (55.8%)                                  | 0.0070          |
| History of hypertension, n (%)                | 1010 (78.6%)                        | 684 (75.4%)                                | 326 (86.2%)                                  | < 0.0001        |
| Diabetes mellitus type 2, n (%)               | 492 (38.3%)                         | 311 (34.3%)                                | 181 (47.9%)                                  | < 0.0001        |
| Dyslipidemia, n (%)                           | 927 (72.1%)                         | 640 (70.6%)                                | 287 (75.9%)                                  | 0.0558          |
| Current or former smoker, n (%)               | 752 (58.5%)                         | 540 (60.1%)                                | 212 (57.6%)                                  | 0.4497          |
| <i>Missing, n</i>                             | 18                                  | 8                                          | 10                                           |                 |
| Alcohol consumption, n (%)                    | 449 (36.9%)                         | 341 (39.5%)                                | 108 (30.4%)                                  | 0.0032          |
| <i>Missing, n</i>                             | 67                                  | 44                                         | 23                                           |                 |
| BMI $\geq$ 30, n (%)                          | 592 (46.1%)                         | 419 (46.2%)                                | 173 (45.8%)                                  | 0.9024          |
| Peripheral vascular disease, n (%)            | 127 (9.9%)                          | 74 (8.2%)                                  | 53 (14.0%)                                   | 0.0020          |
| Coronary artery disease, n (%)                | 352 (27.4%)                         | 223 (24.6%)                                | 129 (34.1%)                                  | 0.0006          |
| Atrial fibrillation, n (%)                    | 242 (18.8%)                         | 147 (16.2%)                                | 95 (25.1%)                                   | 0.0003          |
| Carotid stenosis, n (%)                       | 486 (37.8%)                         | 344 (37.9%)                                | 142 (37.6%)                                  | 0.9497          |
| Intracranial atherosclerotic stenosis, n (%)  | 394 (30.7%)                         | 273 (30.1%)                                | 121 (32.0%)                                  | 0.5072          |
| Anemia, n (%)                                 | 188 (14.6%)                         | 100 (11.0%)                                | 88 (23.3%)                                   | < 0.0001        |
| Pro-coagulant coagulation disorder, n (%)     | 56 (4.4%)                           | 34 (3.8%)                                  | 22 (5.8%)                                    | 0.1009          |
| COPD, n (%)                                   | 135 (10.5%)                         | 80 (8.8%)                                  | 55 (14.6%)                                   | 0.0036          |
| Sleep apnea, n (%)                            | 132 (10.3%)                         | 84 (9.3%)                                  | 48 (12.7%)                                   | 0.0697          |
| Family history of stroke, n (%)               | 290 (22.6%)                         | 193 (21.3%)                                | 97 (25.7%)                                   | 0.0923          |
| Prior TIA, n (%)                              | 144 (11.2%)                         | 95 (10.5%)                                 | 49 (13.0%)                                   | 0.2075          |
| Prior stroke (hemorrhagic or ischemic), n (%) | 267 (20.8%)                         | 164 (18.1%)                                | 103 (27.3%)                                  | 0.0003          |

\*P-value: Continuous variables were compared using Wilcoxon rank-sum tests and categorical variables were compared using Fisher's exact tests.

Table 4. Imaging, stroke, and treatment characteristics among encounters with values of WMH (n=1,285)

|                                                             | <b>Entire Cohort<br/>(n = 1285)</b> | <b>mRS 0-2<br/>Favorable<br/>(n = 907)</b> | <b>mRS 3-6<br/>Unfavorable<br/>(n = 378)</b> | <b>P-value*</b> |
|-------------------------------------------------------------|-------------------------------------|--------------------------------------------|----------------------------------------------|-----------------|
| White matter hyperintensity volume (median [IQR])           | 3.13 [1.02 – 7.50]                  | 2.50 [0.77 – 6.44]                         | 4.44 [1.93 – 9.53]                           | < 0.0001        |
| LVO, n (%)                                                  | 280 (21.8%)                         | 168 (18.5%)                                | 112 (29.6%)                                  | < 0.0001        |
| Anterior (IM1M2) LVO, n (%)                                 | 183 (14.2%)                         | 108 (11.9%)                                | 75 (19.8%)                                   | 0.0003          |
| TOAST Subtype, n (%)                                        |                                     |                                            |                                              |                 |
| Cardioembolism                                              | 366 (28.5%)                         | 252 (27.8%)                                | 114 (30.2%)                                  | 0.4197          |
| Large-artery atherosclerosis                                | 318 (24.8%)                         | 224 (24.7%)                                | 94 (24.9%)                                   |                 |
| Small vessel occlusion                                      | 234 (18.2%)                         | 176 (19.4%)                                | 58 (15.3%)                                   |                 |
| Stroke of undetermined etiology                             | 319 (24.8%)                         | 224 (24.7%)                                | 95 (25.1%)                                   |                 |
| Stroke of other determined etiology                         | 48 (3.7%)                           | 31 (3.4%)                                  | 17 (4.5%)                                    |                 |
| NIHSS at admission (median [IQR], mean ± SD)                | 2 [1 – 5],<br>4.1 ± 5.2             | 2 [1 – 4],<br>3.2 ± 4.2                    | 4 [2 – 9],<br>6.3 ± 6.6                      | < 0.0001        |
| <i>Missing, n</i>                                           | 49                                  | 29                                         | 20                                           |                 |
| NIHSS at admission, n (%)                                   |                                     |                                            |                                              |                 |
| No stroke symptoms (0)                                      | 259 (21.0%)                         | 209 (23.8%)                                | 50 (14.0%)                                   | < 0.0001        |
| Minor stroke (1-4)                                          | 612 (49.5%)                         | 470 (53.5%)                                | 142 (40.0%)                                  |                 |
| Moderate stroke (5-15)                                      | 299 (24.2%)                         | 173 (19.7%)                                | 126 (35.2%)                                  |                 |
| Moderate/severe stroke (16-20)                              | 38 (3.1%)                           | 17 (1.9%)                                  | 21 (5.9%)                                    |                 |
| Severe stroke (21-42)                                       | 28 (2.3%)                           | 9 (1.0%)                                   | 19 (5.3%)                                    |                 |
| <i>Missing</i>                                              | 49 (3.8%)                           | 29 (3.2%)                                  | 20 (5.3%)                                    |                 |
| Treatment, n (%)                                            |                                     |                                            |                                              |                 |
| IV tPA                                                      | 116 (9.0%)                          | 84 (9.3%)                                  | 32 (8.5%)                                    | 0.5968          |
| Mechanical thrombectomy                                     | 11 (0.9%)                           | 9 (1.0%)                                   | 2 (0.5%)                                     |                 |
| IV tPA and mechanical thrombectomy                          | 17 (1.3%)                           | 10 (1.1%)                                  | 7 (1.9%)                                     |                 |
| None                                                        | 1141 (88.8%)                        | 804 (88.6%)                                | 337 (89.2%)                                  |                 |
| IV tPA Treatment, n (%)                                     | 133 (10.4%)                         | 94 (10.4%)                                 | 39 (10.3%)                                   | 1.0000          |
| TICI reperfusion score among thrombectomy treatments, n (%) |                                     |                                            |                                              |                 |
| mTICI 0                                                     | 2 (7.1%)                            | 0 (0.00%)                                  | 2 (22.2%)                                    | 0.0042          |
| mTICI 1                                                     | 0 (0.00%)                           | 0 (0.00%)                                  | 0 (0.00%)                                    |                 |
| mTICI 2A                                                    | 2 (7.1%)                            | 0 (0.00%)                                  | 2 (22.2%)                                    |                 |
| mTICI 2B                                                    | 11 (39.3%)                          | 7 (36.8%)                                  | 4 (44.4%)                                    |                 |
| mTICI 3                                                     | 13 (46.4%)                          | 12 (63.2%)                                 | 1 (11.1%)                                    |                 |
| Secondary intracerebral hemorrhage, n (%)                   | 112 (8.7%)                          | 71 (7.8%)                                  | 41 (10.9%)                                   | 0.0833          |

\*P-value: Continuous variables were compared using Wilcoxon rank-sum tests and categorical variables were compared using Fisher's exact tests.

Table 5. Imputed data multivariable model for favorable functional outcome (all p < 0.05)

| <b>Odds Ratio Estimates (n = 1601)</b>             |           |               |        |                |
|----------------------------------------------------|-----------|---------------|--------|----------------|
| <b>Effect</b>                                      | <b>OR</b> | <b>95% CI</b> |        | <b>P-Value</b> |
| WMH Volume (1 unit increase for volume $\leq$ 4)   | 0.853     | 0.769         | 0.945  | 0.0005         |
| WMH Volume (1 unit increase for volume > 4)        | 0.986     | 0.960         | 1.011  |                |
| Age                                                | 0.971     | 0.961         | 0.981  | < 0.0001       |
| Female                                             | 0.752     | 0.594         | 0.953  | 0.0181         |
| Diabetes Mellitus Type 2                           | 0.632     | 0.497         | 0.804  | 0.0002         |
| Anemia                                             | 0.446     | 0.328         | 0.606  | < 0.0001       |
| COPD                                               | 0.650     | 0.460         | 0.918  | 0.0145         |
| Sleep Apnea                                        | 0.670     | 0.464         | 0.968  | 0.0330         |
| LVO                                                | 0.634     | 0.470         | 0.855  | 0.0029         |
| NIHSS at Admission: Minor vs No Symptoms           | 0.745     | 0.534         | 1.041  | < 0.0001       |
| NIHSS at Admission: Moderate vs No Symptoms        | 0.302     | 0.208         | 0.437  |                |
| NIHSS at Admission: Moderate/Severe vs No Symptoms | 0.117     | 0.059         | 0.235  |                |
| NIHSS at Admission: Severe vs No Symptoms          | 0.075     | 0.032         | 0.175  |                |
| Treatment: Mechanical Thrombectomy vs None         | 3.703     | 1.059         | 12.945 | 0.0050         |
| Treatment: IV tPA vs None                          | 1.942     | 1.255         | 3.006  |                |
| Treatment: IV tPA/Mechanical Thrombectomy vs None  | 1.820     | 0.660         | 5.015  |                |

Table 6. Baseline demographic and stroke risk factor characteristics among all encounters without large vessel occlusion

|                                               | <b>Entire Cohort<br/>(n = 1248)</b> | <b>mRS 0-2<br/>Favorable<br/>(n = 874)</b> | <b>mRS 3-6<br/>Unfavorable<br/>(n = 374)</b> | <b>P-value*</b> |
|-----------------------------------------------|-------------------------------------|--------------------------------------------|----------------------------------------------|-----------------|
| Age (years) (median [IQR], mean $\pm$ SD)     | 69 [59 – 78],<br>67.9 $\pm$ 13.5    | 67 [58 – 76],<br>66.1 $\pm$ 13.4           | 74 [64 – 82],<br>72.1 $\pm$ 12.9             | < 0.0001        |
| Females, n (%)                                | 612 (49.0%)                         | 412 (47.1%)                                | 200 (53.5%)                                  | 0.0416          |
| History of hypertension, n (%)                | 981 (78.6%)                         | 663 (75.9%)                                | 318 (85.0%)                                  | 0.0003          |
| Diabetes mellitus type 2, n (%)               | 504 (40.4%)                         | 317 (36.3%)                                | 187 (50.0%)                                  | < 0.0001        |
| Dyslipidemia, n (%)                           | 894 (71.6%)                         | 626 (71.6%)                                | 268 (71.7%)                                  | 1.0000          |
| Current or former smoker, n (%)               | 738 (59.5%)                         | 510 (58.7%)                                | 228 (61.5%)                                  | 0.3769          |
| <i>Missing, n</i>                             | 8                                   | 5                                          | 3                                            |                 |
| Alcohol consumption, n (%)                    | 430 (36.1%)                         | 332 (39.7%)                                | 98 (27.5%)                                   | <0.0001         |
| <i>Missing, n</i>                             | 56                                  | 38                                         | 18                                           |                 |
| BMI $\geq$ 30, n (%)                          | 599 (48.0%)                         | 414 (47.4%)                                | 185 (49.5%)                                  | 0.5363          |
| Peripheral vascular disease, n (%)            | 115 (9.2%)                          | 70 (8.0%)                                  | 45 (12.0%)                                   | 0.0321          |
| Coronary artery disease, n (%)                | 379 (30.4%)                         | 239 (27.4%)                                | 140 (37.4%)                                  | 0.0005          |
| Atrial fibrillation, n (%)                    | 273 (21.9%)                         | 167 (19.1%)                                | 106 (28.3%)                                  | 0.0004          |
| Carotid stenosis, n (%)                       | 416 (33.3%)                         | 305 (34.9%)                                | 111 (29.7%)                                  | 0.0770          |
| Intracranial atherosclerotic stenosis, n (%)  | 327 (26.2%)                         | 230 (26.3%)                                | 97 (25.9%)                                   | 0.9440          |
| Anemia, n (%)                                 | 204 (16.4%)                         | 108 (12.4%)                                | 96 (25.7%)                                   | < 0.0001        |
| Pro-coagulant coagulation disorder, n (%)     | 54 (4.3%)                           | 33 (3.8%)                                  | 21 (5.6%)                                    | 0.1709          |
| COPD, n (%)                                   | 141 (11.3%)                         | 84 (9.6%)                                  | 57 (15.2%)                                   | 0.0061          |
| Sleep apnea, n (%)                            | 141 (11.3%)                         | 86 (9.8%)                                  | 55 (14.7%)                                   | 0.0147          |
| Family history of stroke, n (%)               | 279 (22.4%)                         | 187 (21.4%)                                | 92 (24.6%)                                   | 0.2354          |
| Prior TIA, n (%)                              | 153 (12.3%)                         | 103 (11.8%)                                | 50 (13.4%)                                   | 0.4515          |
| Prior stroke (hemorrhagic or ischemic), n (%) | 260 (20.8%)                         | 157 (18.0%)                                | 103 (27.5%)                                  | 0.0002          |

\*P-value: Continuous variables were compared using Wilcoxon rank-sum tests and categorical variables were compared using Fisher's exact tests.



Table 7. Imaging, stroke, and treatment characteristics among all encounters without large vessel occlusion

|                                                                        | <b>Entire Cohort<br/>(n = 1248)</b> | <b>mRS 0-2<br/>Favorable<br/>(n = 874)</b> | <b>mRS 3-6<br/>Unfavorable<br/>(n = 374)</b> | <b>P-value*</b> |
|------------------------------------------------------------------------|-------------------------------------|--------------------------------------------|----------------------------------------------|-----------------|
| White matter hyperintensity volume (median [IQR])<br><i>Missing, n</i> | 3.28 [1.13 – 7.72]<br>243           | 2.70 [0.91 – 6.68]<br>135                  | 4.83 [2.29 – 10.77]<br>108                   | < 0.0001        |
| TOAST Subtype, n (%)                                                   |                                     |                                            |                                              | 0.6037          |
| Cardioembolism                                                         | 392 (31.4%)                         | 271 (31.0%)                                | 121 (32.4%)                                  |                 |
| Large-artery atherosclerosis                                           | 202 (16.2%)                         | 145 (16.6%)                                | 57 (15.2%)                                   |                 |
| Small vessel occlusion                                                 | 259 (20.8%)                         | 189 (21.6%)                                | 70 (18.7%)                                   |                 |
| Stroke of undetermined etiology                                        | 351 (28.1%)                         | 241 (27.6%)                                | 110 (29.4%)                                  |                 |
| Stroke of other determined etiology                                    | 44 (3.5%)                           | 28 (3.2%)                                  | 16 (4.3%)                                    |                 |
| NIHSS at admission (median [IQR])<br><i>Missing, n</i>                 | 2 [1 – 5]<br>61                     | 2 [1 – 4]<br>30                            | 4 [1 – 7]<br>31                              | < 0.0001        |
| NIHSS at admission, n (%)                                              |                                     |                                            |                                              | < 0.0001        |
| No stroke symptoms (0)                                                 | 262 (22.1%)                         | 206 (24.4%)                                | 56 (16.3%)                                   |                 |
| Minor stroke (1-4)                                                     | 610 (51.4%)                         | 457 (54.1%)                                | 153 (44.6%)                                  |                 |
| Moderate stroke (5-15)                                                 | 283 (23.8%)                         | 171 (20.3%)                                | 112 (32.7%)                                  |                 |
| Moderate/severe stroke (16-20)                                         | 16 (1.3%)                           | 5 (0.6%)                                   | 11 (3.2%)                                    |                 |
| Severe stroke (21-42)                                                  | 16 (1.3%)                           | 5 (0.6%)                                   | 11 (3.2%)                                    |                 |
| <i>Missing</i>                                                         | 61                                  | 30                                         | 31                                           |                 |
| Treatment, n (%)                                                       |                                     |                                            |                                              | 0.1440          |
| IV tPA                                                                 | 121 (9.7%)                          | 92 (10.5%)                                 | 29 (7.8%)                                    |                 |
| Mechanical thrombectomy                                                | 0 (0.0%)                            | 0 (0.0%)                                   | 0 (0.0%)                                     |                 |
| IV tPA and mechanical thrombectomy                                     | 0 (0.0%)                            | 0 (0.0%)                                   | 0 (0.0%)                                     |                 |
| None                                                                   | 1127 (90.3%)                        | 782 (89.5%)                                | 345 (92.2%)                                  |                 |
| IV tPA Treatment, n (%)                                                | 121 (9.7%)                          | 92 (10.5%)                                 | 29 (7.7%)                                    | 0.1440          |
| Secondary intracerebral hemorrhage, n (%)                              | 76 (6.1%)                           | 47 (5.4%)                                  | 29 (7.8%)                                    | 0.1209          |

\*P-value: Continuous variables were compared using Wilcoxon rank-sum tests and categorical variables were compared using Fisher's exact tests.

Table 8. Imputed data multivariable model results for favorable functional outcome for encounters without large vessel occlusion (all p < 0.05)

| <b>Odds Ratio Estimates for Not LVO Encounters<br/>(n = 1248)</b> |           |               |       |                |
|-------------------------------------------------------------------|-----------|---------------|-------|----------------|
| <b>Effect</b>                                                     | <b>OR</b> | <b>95% CI</b> |       | <b>P-Value</b> |
| WMH Volume (1 unit increase for volume $\leq$ 4)                  | 0.841     | 0.735         | 0.962 | 0.0005         |
| WMH Volume (1 unit increase for volume > 4)                       | 0.976     | 0.951         | 1.002 |                |
| Age                                                               | 0.969     | 0.957         | 0.981 | <.0001         |
| Female                                                            | 0.748     | 0.572         | 0.978 | 0.034          |
| Diabetes Mellitus Type 2                                          | 0.598     | 0.456         | 0.784 | 0.0002         |
| Carotid Stenosis                                                  | 1.573     | 1.179         | 2.100 | 0.0021         |
| Anemia                                                            | 0.482     | 0.345         | 0.672 | < 0.0001       |
| Sleep Apnea                                                       | 0.623     | 0.416         | 0.932 | 0.0213         |
| NIHSS at Admission: Minor vs No Symptoms                          | 0.895     | 0.624         | 1.282 | < 0.0001       |
| NIHSS at Admission: Moderate vs No Symptoms                       | 0.373     | 0.250         | 0.556 |                |
| NIHSS at Admission: Moderate/Severe vs No Symptoms                | 0.109     | 0.034         | 0.350 |                |
| NIHSS at Admission: Severe vs No Symptoms                         | 0.160     | 0.050         | 0.513 |                |

Table 9. Baseline demographic and stroke risk factor characteristics among all encounters with large vessel occlusion

|                                                      | <b>Entire Cohort<br/>(n = 353)</b> | <b>mRS 0-2<br/>Favorable<br/>(n = 200)</b> | <b>mRS 3-6<br/>Unfavorable<br/>(n = 153)</b> | <b>P-value*</b> |
|------------------------------------------------------|------------------------------------|--------------------------------------------|----------------------------------------------|-----------------|
| Age (years) (median [IQR], mean $\pm$ SD)            | 67 [58 – 77],<br>67.2 $\pm$ 13.2   | 64 [53 – 73],<br>63.7 $\pm$ 12.9           | 73 [63 – 82],<br>71.8 $\pm$ 12.2             | < 0.0001        |
| Females, n (%)                                       | 176 (49.9%)                        | 90 (45.0%)                                 | 86 (56.2%)                                   | 0.0415          |
| History of hypertension, n (%)                       | 283 (80.2%)                        | 151 (75.5%)                                | 132 (86.3%)                                  | 0.0150          |
| Diabetes mellitus type 2, n (%)                      | 117 (33.1%)                        | 58 (29.0%)                                 | 59 (38.6%)                                   | 0.0680          |
| Dyslipidemia, n (%)                                  | 254 (72.0%)                        | 132 (66.0%)                                | 122 (79.7%)                                  | 0.0058          |
| Current or former smoker, n (%)<br><i>Missing, n</i> | 216 (65.1%)<br>21                  | 138 (71.1%)<br>6                           | 78 (56.5%)<br>15                             | 0.0072          |
| Alcohol consumption, n (%)<br><i>Missing, n</i>      | 122 (38.1%)<br>33                  | 75 (40.8%)<br>16                           | 47 (34.6%)<br>17                             | 0.2951          |
| BMI $\geq$ 30, n (%)                                 | 156 (44.2%)                        | 94 (47.0%)                                 | 62 (40.5%)                                   | 0.2358          |
| Peripheral vascular disease, n (%)                   | 46 (13.0%)                         | 22 (11.0%)                                 | 24 (15.7%)                                   | 0.2054          |
| Coronary artery disease, n (%)                       | 98 (27.8%)                         | 47 (23.5%)                                 | 51 (33.3%)                                   | 0.0426          |
| Atrial fibrillation, n (%)                           | 82 (23.2%)                         | 30 (15.0%)                                 | 52 (34.0%)                                   | < 0.0001        |
| Carotid stenosis, n (%)                              | 191 (54.1%)                        | 103 (51.5%)                                | 88 (57.5%)                                   | 0.2821          |
| Intracranial atherosclerotic stenosis, n (%)         | 156 (44.2%)                        | 88 (44.0%)                                 | 68 (44.4%)                                   | 1.0000          |
| Anemia, n (%)                                        | 39 (11.0%)                         | 12 (6.0%)                                  | 27 (17.7%)                                   | 0.0009          |
| Pro-coagulant coagulation disorder, n (%)            | 17 (4.8%)                          | 9 (4.5%)                                   | 8 (5.2%)                                     | 0.8050          |
| COPD, n (%)                                          | 47 (13.3%)                         | 20 (10.0%)                                 | 27 (17.7%)                                   | 0.0405          |
| Sleep apnea, n (%)                                   | 29 (8.2%)                          | 16 (8.0%)                                  | 13 (8.5%)                                    | 1.0000          |
| Family history of stroke, n (%)                      | 79 (22.4%)                         | 37 (18.5%)                                 | 42 (27.5%)                                   | 0.0533          |
| Prior TIA, n (%)                                     | 38 (10.8%)                         | 17 (8.5%)                                  | 21 (13.7%)                                   | 0.1226          |
| Prior stroke (hemorrhagic or ischemic), n (%)        | 82 (23.2%)                         | 43 (21.5%)                                 | 39 (25.5%)                                   | 0.4456          |

\*P-value: Continuous variables were compared using Wilcoxon rank-sum tests and categorical variables were compared using Fisher's exact tests.

Table 10. Imaging, stroke, and treatment characteristics among all encounters with large vessel occlusion

|                                                                        | <b>Entire Cohort<br/>(n = 353)</b> | <b>mRS 0-2<br/>Favorable<br/>(n = 200)</b> | <b>mRS 3-6<br/>Unfavorable<br/>(n = 153)</b> | <b>P-value*</b> |
|------------------------------------------------------------------------|------------------------------------|--------------------------------------------|----------------------------------------------|-----------------|
| White matter hyperintensity volume (median [IQR])<br><i>Missing, n</i> | 2.56 [0.67 – 6.25]<br>73           | 1.66 [0.43 – 5.51]<br>32                   | 3.90 [1.40 – 7.20]<br>41                     | 0.0011          |
| Anterior (IM1M2) LVO, n (%)                                            | 241 (68.3%)                        | 131 (65.5%)                                | 110 (71.9%)                                  | 0.2069          |
| TOAST Subtype, n (%)                                                   |                                    |                                            |                                              |                 |
| Cardioembolism                                                         | 98 (27.8%)                         | 44 (22.0%)                                 | 54 (35.3%)                                   | 0.0291          |
| Large-artery atherosclerosis                                           | 183 (51.8%)                        | 114 (57.0%)                                | 69 (45.1%)                                   |                 |
| Small vessel occlusion                                                 | 0 (0.0%)                           | 0 (0.0%)                                   | 0 (0.0%)                                     |                 |
| Stroke of undetermined etiology                                        | 61 (17.3%)                         | 34 (17.0%)                                 | 27 (17.7%)                                   |                 |
| Stroke of other determined etiology                                    | 11 (3.1%)                          | 8 (4.0%)                                   | 3 (2.0%)                                     |                 |
| NIHSS at admission (median [IQR])<br><i>Missing, n</i>                 | 5 [2 – 13]<br>12                   | 3 [1 – 8]<br>6                             | 8 [3 – 18]<br>6                              | < 0.0001        |
| NIHSS at admission, n (%)                                              |                                    |                                            |                                              |                 |
| No stroke symptoms (0)                                                 | 47 (13.8%)                         | 40 (20.6%)                                 | 7 (4.8%)                                     | < 0.0001        |
| Minor stroke (1-4)                                                     | 118 (34.6%)                        | 79 (40.7%)                                 | 39 (26.5%)                                   |                 |
| Moderate stroke (5-15)                                                 | 101 (29.6%)                        | 52 (26.8%)                                 | 49 (33.3%)                                   |                 |
| Moderate/severe stroke (16-20)                                         | 43 (12.6%)                         | 16 (8.2%)                                  | 27 (18.4%)                                   |                 |
| Severe stroke (21-42)                                                  | 32 (9.4%)                          | 7 (3.6%)                                   | 25 (17.0%)                                   |                 |
| <i>Missing</i>                                                         | 12                                 | 6                                          | 6                                            |                 |
| Treatment, n (%)                                                       |                                    |                                            |                                              |                 |
| IV tPA                                                                 | 30 (8.5%)                          | 18 (9.0%)                                  | 12 (7.8%)                                    | 0.4829          |
| Mechanical thrombectomy                                                | 15 (4.3%)                          | 9 (4.5%)                                   | 6 (3.9%)                                     |                 |
| IV tPA and mechanical thrombectomy                                     | 24 (6.8%)                          | 10 (5.0%)                                  | 14 (9.2%)                                    |                 |
| None                                                                   | 284 (80.5%)                        | 163 (81.5%)                                | 121 (79.1%)                                  |                 |
| IV tPA Treatment, n (%)                                                | 54 (15.3%)                         | 28 (14.0%)                                 | 26 (17.0%)                                   | 0.4586          |
| TICI reperfusion score among thrombectomy treatments, n (%)            |                                    |                                            |                                              |                 |
| mTICI 0                                                                | 6 (15.4%)                          | 0 (0.00%)                                  | 6 (30.0%)                                    | 0.0074          |
| mTICI 1                                                                | 0 (0.00%)                          | 0 (0.00%)                                  | 0 (0.00%)                                    |                 |
| mTICI 2A                                                               | 2 (5.1%)                           | 0 (0.0%)                                   | 2 (10.0%)                                    |                 |
| mTICI 2B                                                               | 14 (35.9%)                         | 7 (36.8%)                                  | 7 (35.0%)                                    |                 |
| mTICI 3                                                                | 17 (43.6%)                         | 12 (63.2%)                                 | 5 (25.0%)                                    |                 |
| Secondary intracerebral hemorrhage, n (%)                              | 54 (15.3%)                         | 28 (14.0%)                                 | 26 (17.0%)                                   | 0.4586          |

\*P-value: Continuous variables were compared using Wilcoxon rank-sum tests and categorical variables were compared using Fisher's exact tests.

Table 11. Imputed data multivariable model for favorable functional outcome for encounters with large vessel occlusion (all  $p < 0.05$ )

| <b>Odds Ratio Estimates for LVO Encounters</b>     |           |               |       |                |
|----------------------------------------------------|-----------|---------------|-------|----------------|
| <b>(n = 353)</b>                                   |           |               |       |                |
| <b>Effect</b>                                      | <b>OR</b> | <b>95% CI</b> |       | <b>P-Value</b> |
| WMH Volume (1 unit increase for volume $\leq 4$ )  | 0.741     | 0.595         | 0.923 | 0.0065         |
| WMH Volume (1 unit increase for volume $> 4$ )     | 1.066     | 0.993         | 1.144 |                |
| Age                                                | 0.972     | 0.952         | 0.994 | 0.0114         |
| Dyslipidemia                                       | 0.495     | 0.274         | 0.895 | 0.0199         |
| Smoking Ever vs Never                              | 2.504     | 1.418         | 4.424 | 0.0016         |
| Anemia                                             | 0.231     | 0.093         | 0.573 | 0.0016         |
| COPD                                               | 0.426     | 0.199         | 0.912 | 0.0280         |
| Family History of Stroke                           | 0.508     | 0.278         | 0.929 | 0.0279         |
| NIHSS at Admission: Minor vs No Symptoms           | 0.333     | 0.126         | 0.877 | < 0.0001       |
| NIHSS at Admission: Moderate vs No Symptoms        | 0.166     | 0.061         | 0.452 |                |
| NIHSS at Admission: Moderate/Severe vs No Symptoms | 0.087     | 0.028         | 0.271 |                |
| NIHSS at Admission: Severe vs No Symptoms          | 0.047     | 0.013         | 0.170 |                |
